# Supplementary material for: Chromatographic determination of benzodiazepines in vitreous humor after microwave-assisted extraction
Source: Royal Society of Chemistry journal article supplement (doi:10.1039/c3ay40814k), 2013-01-01
Supplement: c3ay40814k.pdf [file c3ay40814k.pdf]

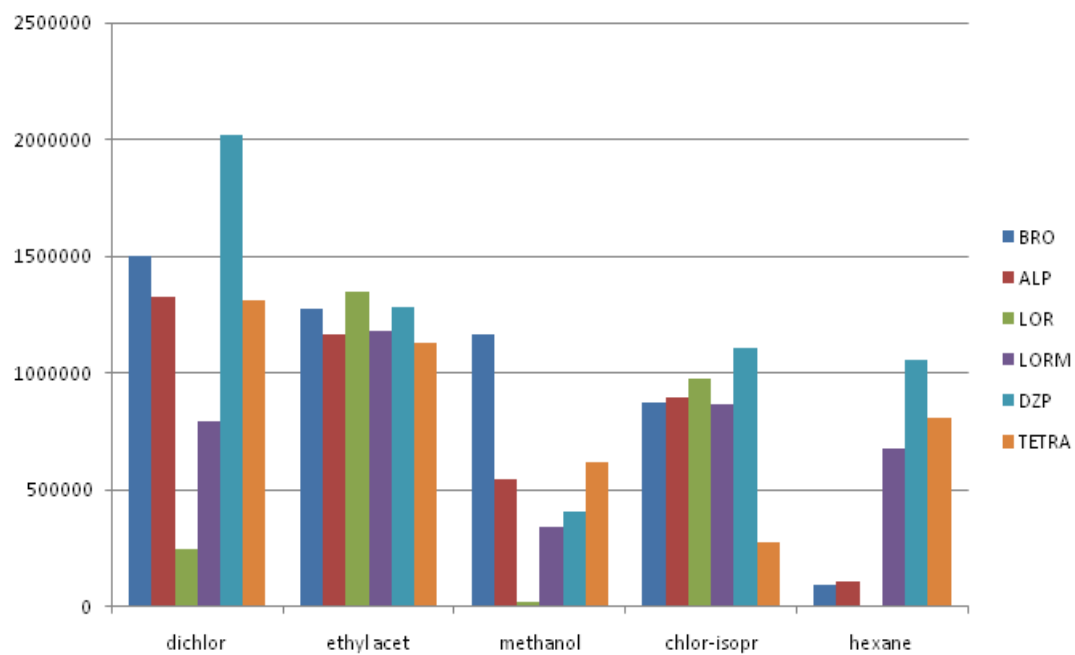

**Figure 1S.** Influence of extraction solvent: Dichloromethane, ethyl acetate, methanol chloroformisopropanol (4:1, v/v) and hexane.
